# Supplementary material for: Lineage-specific variations of congruent evolution among DNA sequences from three genomes, and relaxed selective constraints on rbcL in Cryptomonas (Cryptophyceae)
Source: PubMed Central journal article supplement (PMC1285359; doi:10.1186/1471-2148-5-56), 2005-10-18
Supplement: 1471-2148-5-56-S1.pdf [file 1471-2148-5-56-S1.pdf]

**Additional file 1 – Evolutionary models and support values for the *Cryptomonas* clades in the unrooted rbcL data set**

|              | All Codon Positions | Position 1      | Position 2 | Position 3      | Protein           |
|--------------|---------------------|-----------------|------------|-----------------|-------------------|
| ntax         | 23                  | 23              | 23         | 23              | 23                |
| npos         | 1188                | 396             | 396        | 396             | 369               |
| basefreq (P) | <b>0.0163</b>       | 1.000           | 1.000      | <b>0.000</b>    | passed            |
| evol. model  | GTR+I+ $\Gamma$     | GTR+I+ $\Gamma$ | TVM+I      | GTR+I+ $\Gamma$ | CpRev+I+ $\Gamma$ |

  

| Clades                                          | Support              |               |               |                   |               |
|-------------------------------------------------|----------------------|---------------|---------------|-------------------|---------------|
|                                                 | ML/MP/NJ/LD/PP       | ML/MP/NJ/PP   | ML/MP/NJ/PP   | ML/MP/NJ/LD/PP    | ML/MP/NJ/PP   |
| <i>C. borealis</i>                              | 81/-/-/0.99          | 60/+/+0.76    | -/-/0.60      | +/-/-/53          | 83/80/90/1.00 |
| <i>C. curvata</i>                               | 100/99/100/100/1.00  | 60+/55/0.97   | 54/59/70/0.94 | 99/99/99/93/1.00  | 97/75/97/0.89 |
| <i>C. marssonii</i>                             | 98/88/98/99/1.00     | +/-/(+)/-     | -/-/+0.57     | 69/76/73/72/0.90  | -             |
| <i>C. ovata</i>                                 | 100/100/100/100/1.00 | 51+/63/0.55   | -             | 98/99/99/99/1.00  | -/+/-         |
| <i>C. paramaecium</i>                           | 100/100/100/99/1.00  | 99/97/99/1.00 | 62/71/75/1.00 | 99/98/99/80/1.00  | 98/98/99/1.00 |
| <i>C. pyrenoidifera</i>                         | 89/84/99/99/0.99     | -             | -             | 87/85/97/87/1.00  | +/-/0.61      |
| <i>C. pyrenoidosa</i><br>without CCAP<br>979/61 | 97/100/100/100/1.00  | +76/94/0.84   | -/+58/-       | 98/100/99/99/1.00 | 97/62/94/0.98 |
| <i>C. tetrapyrenoidosa</i>                      | 99/99/100/100/1.00   | 88/83/90/0.99 | 59/59/70/0.96 | 84/90/97/87/0.99  | 96/94/94/1.00 |

Clade designations according to [11]. Clades LB and NoPyr were not supported in the *rbcL* phylogeny. Basefreq (P), probability for a homogeneity of base frequencies or amino acids across taxa (for DNA determined with PAUP\*; for amino acids determined with Tree- Puzzle; red, rejected, i.e. base frequencies were heterogenous); CpRev, general time reversible model for plastid- encoded genes [52]; evol. model, evolutionary model according to the Akaike Information Criterion;  $\Gamma$ , gamma- distributed among- site rate variation; GTR, the general time reversible model [51]; I, proportion of invariable sites; LD, logdet/neighbor- joining bootstrap; ML, maximum likelihood bootstrap; MP, maximum parsimony bootstrap; NJ, distance/neighbor- joining bootstrap; npos, number of positions in the data set; ntax, number of taxa in the data set; PP, posterior probability (Bayesian analysis); TVM, the transversion model [51]; +, present but not supported; -, not present
