# Supplementary material for: Lineage-specific variations of congruent evolution among DNA sequences from three genomes, and relaxed selective constraints on rbcL in Cryptomonas (Cryptophyceae)
Source: PubMed Central journal article supplement (PMC1285359; doi:10.1186/1471-2148-5-56), 2005-10-18
Supplement: 1471-2148-5-56-S3.pdf [file 1471-2148-5-56-S3.pdf]

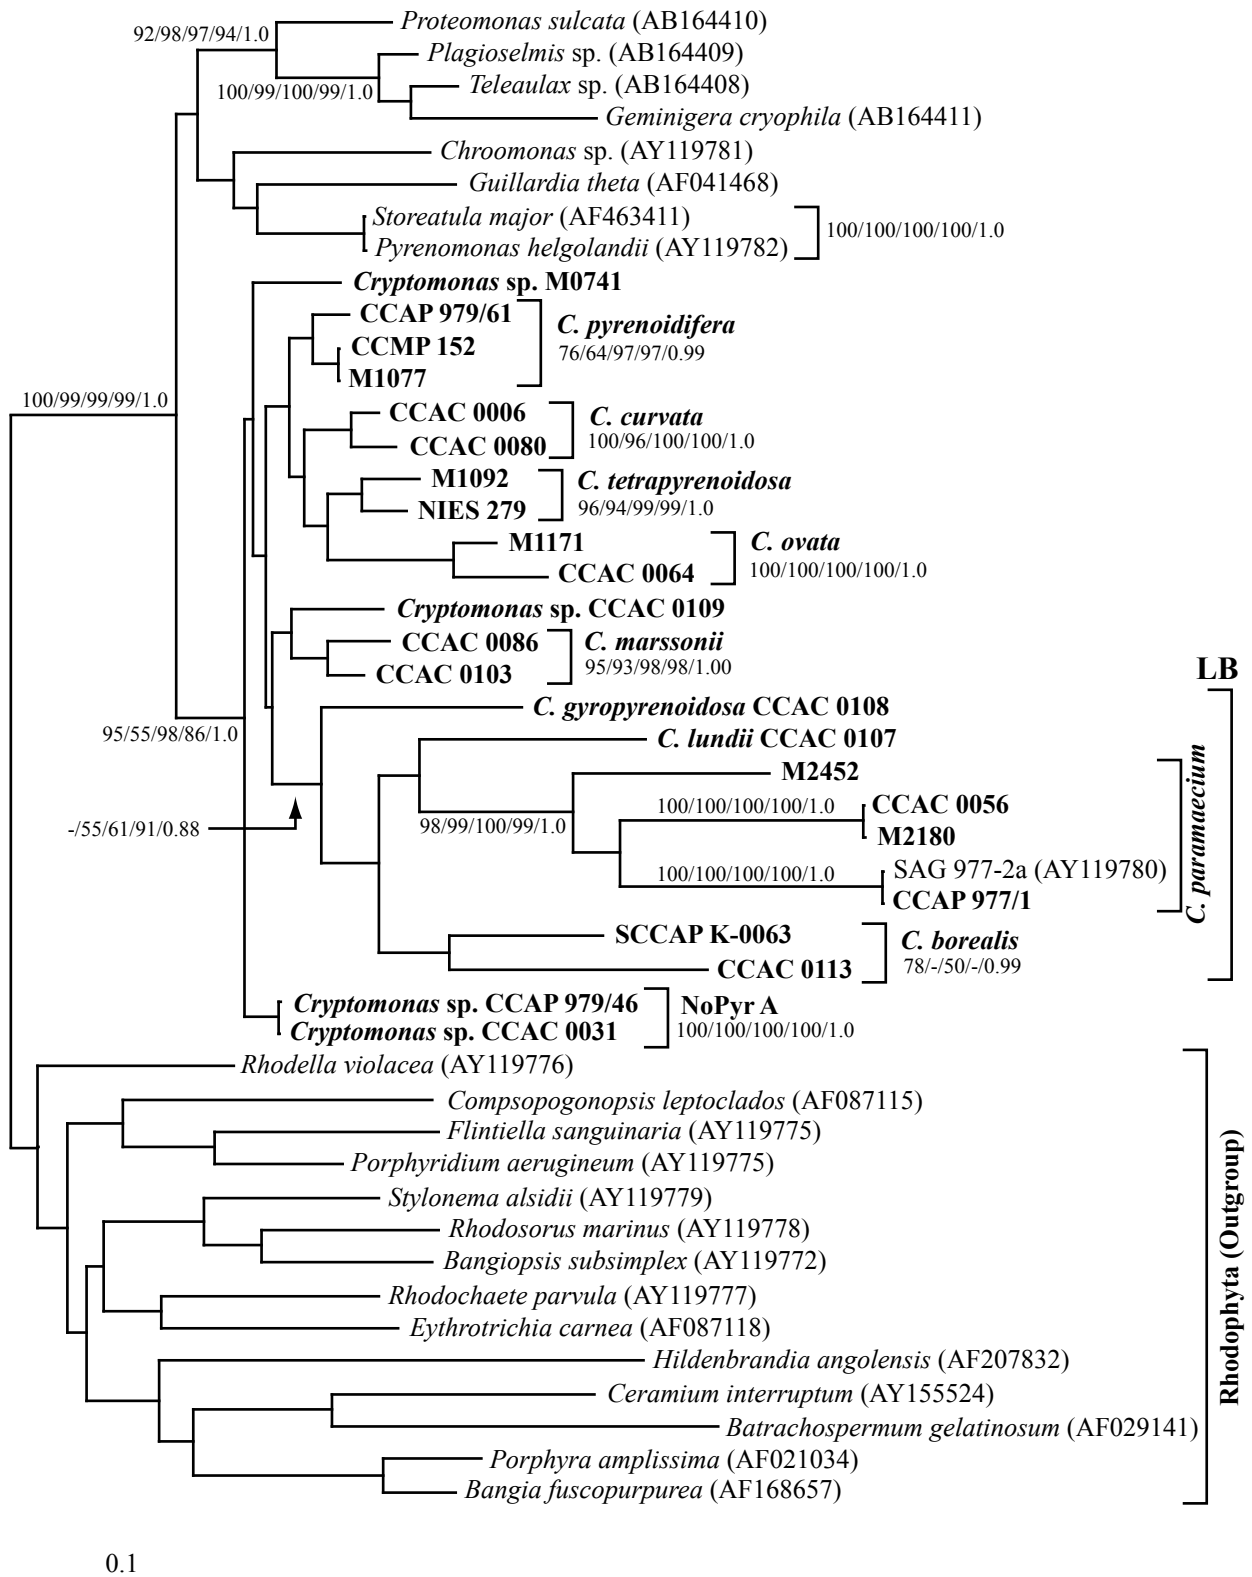

**Additional file 3 - Rooted maximum likelihood tree of cryptophyte *rbcL* sequences including all codon positions (46 taxa; 990 nt)**

As outgroup taxa, 14 rhodophyte *rbcL* sequences representing most bangiophyte clades and the Florideophyceae were chosen. In this tree, clade LB is present, but not always supported. Support values from left to right: maximum likelihood bootstrap/maximum parsimony bootstrap/distance bootstrap/logdet bootstrap/posterior probabilities (Bayesian analysis). Evolutionary model according to the Akaike Information Criterion: GTR+I+ $\Gamma$ . Bold face, new sequences; scale bar, substitutions per site.  $-lnL = 14480$
