# Supplementary material for: Lineage-specific variations of congruent evolution among DNA sequences from three genomes, and relaxed selective constraints on rbcL in Cryptomonas (Cryptophyceae)
Source: PubMed Central journal article supplement (PMC1285359; doi:10.1186/1471-2148-5-56), 2005-10-18
Supplement: 1471-2148-5-56-S4.pdf [file 1471-2148-5-56-S4.pdf]

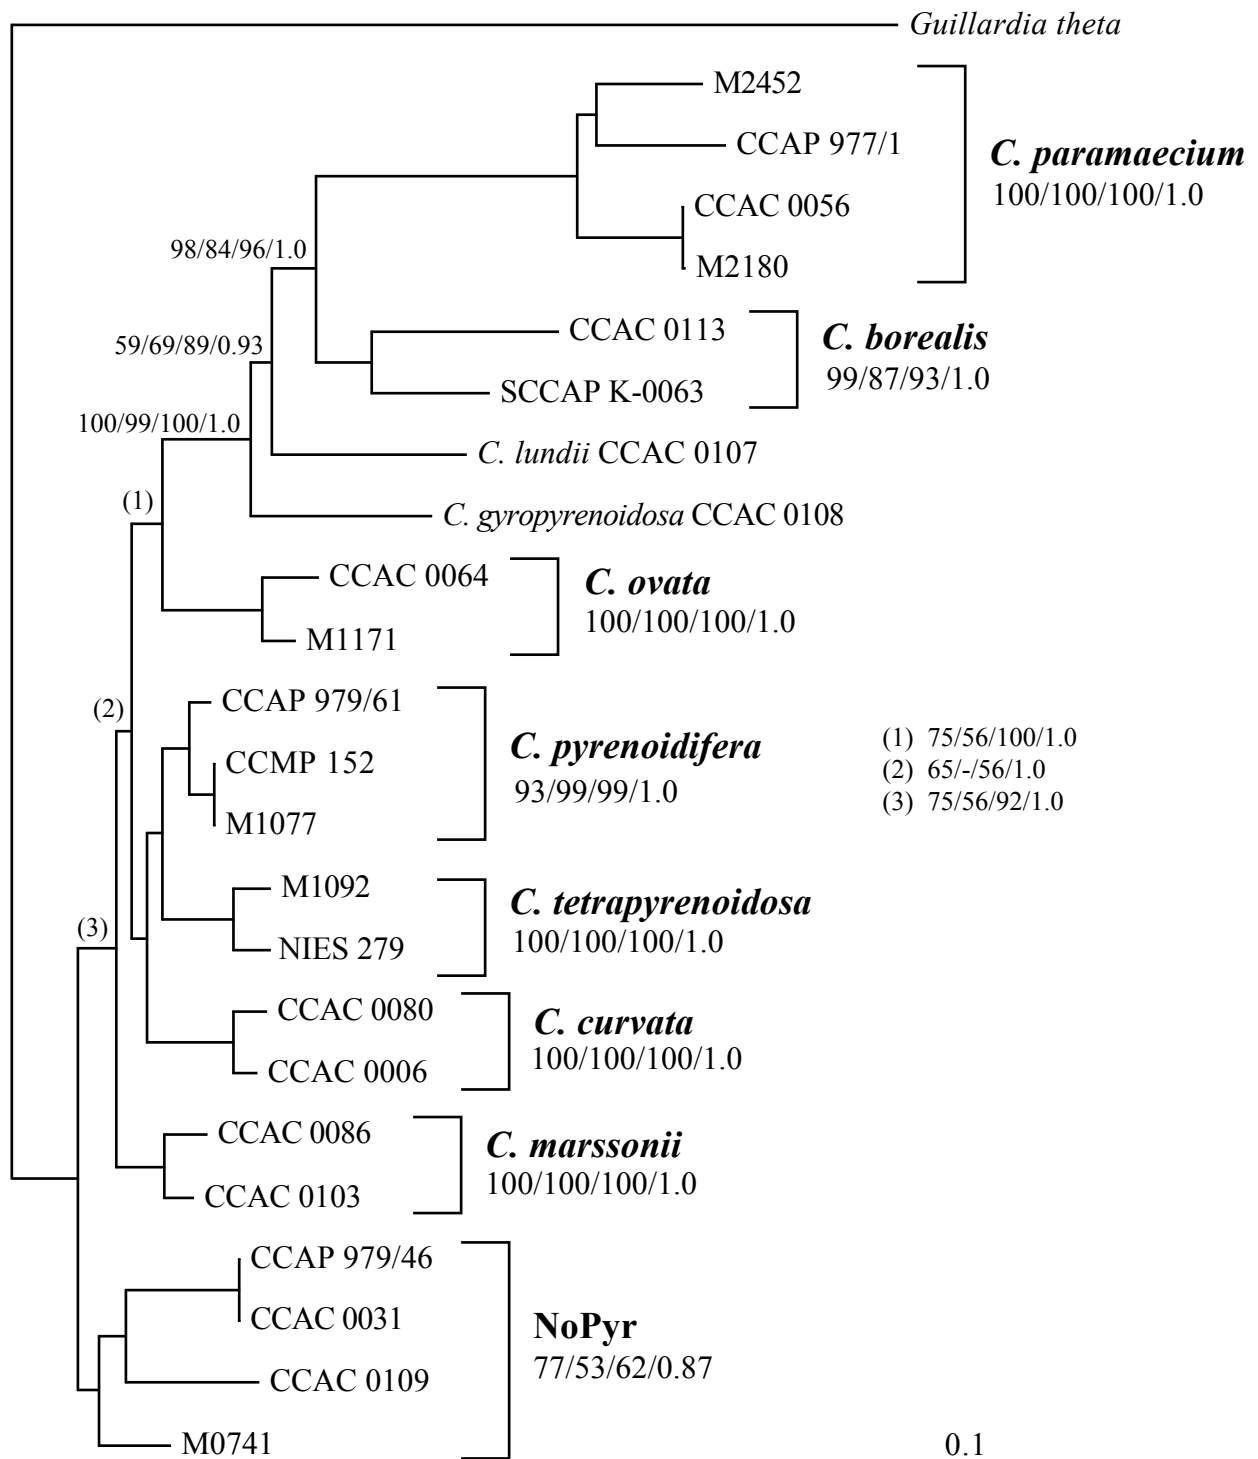

**Additional file 4 - Rooted maximum likelihood tree of concatenated nuclear SSU rDNA, partial nuclear LSU rDNA, nucleomorph SSU rDNA and *rbcL* sequences**

Twenty-four taxa; 5154 positions; for Bayesian analysis, the data set was subdivided into four partitions (nuclear LSU rDNA, 996 positions; nuclear SSU rDNA, 1536 positions; nucleomorph SSU rDNA, 1464 positions; *rbcL*, 1188 positions); likelihood settings were set to GTR+I+ $\Gamma$ +covarion with unlinked state frequencies, shape parameter, rate matrix and covarion switch rates. Support values from left to right, maximum likelihood bootstrap/ maximum parsimony bootstrap/ distance (neighbor-joining) bootstrap/ posterior probabilities (Bayesian analysis). Evolutionary model, GTR+I+ $\Gamma$ ; scale bar, substitutions per site;  $-\ln L = 21714$
